# Supplementary material
Source: PubMed Central journal article supplement (PMC5834397)
Supplement: NIHMS937676-supplement-1.pdf [file NIHMS937676-supplement-1.pdf]

*Supporting information for*

Nanoparticle-Mediated Trapping of Wnt Family Member 5A in Tumor Microenvironments Enhances Immunotherapy for B-Raf Proto-Oncogene-Mutant Melanoma

Qi Liu<sup>1,#</sup>, Hongda Zhu<sup>1,4,#</sup>, Karthik Tiruthani<sup>2</sup>, Limei Shen<sup>1</sup>, Fengqian Chen<sup>5</sup>, Keliang Gao<sup>2</sup>, Xueqiong Zhang<sup>1</sup>, Lin Hou<sup>1</sup>, Degeng Wang<sup>5</sup>, Rihe Liu<sup>2,3,\*</sup>, and Leaf Huang<sup>1,\*</sup>

<sup>1</sup>Division of Pharmacoengineering and Molecular Pharmaceutics and Center for Nanotechnology in Drug Delivery, <sup>2</sup>Division of Chemical Biology and Medicinal Chemistry, Eshelman School of Pharmacy, <sup>3</sup>Carolina Center for Genome Sciences, University of North Carolina at Chapel Hill, Chapel Hill, NC 27599, USA; <sup>4</sup>School of Food and Biology Engineering, Key Laboratory of Fermentation Engineering, Hubei University of Technology, Wuhan 430068, China; <sup>5</sup>Department of Environmental Toxicology, The Institute of Environmental and Human Health (TIEHH) and the Center for Biotechnology & Genomics, Texas Tech University, Lubbock, TX 79416, USA.

<sup>#</sup> Contributed equally

<sup>\*</sup> Corresponding authors. E-mail: leafh@email.unc.edu; rliu@email.unc.edu

## Supporting Information

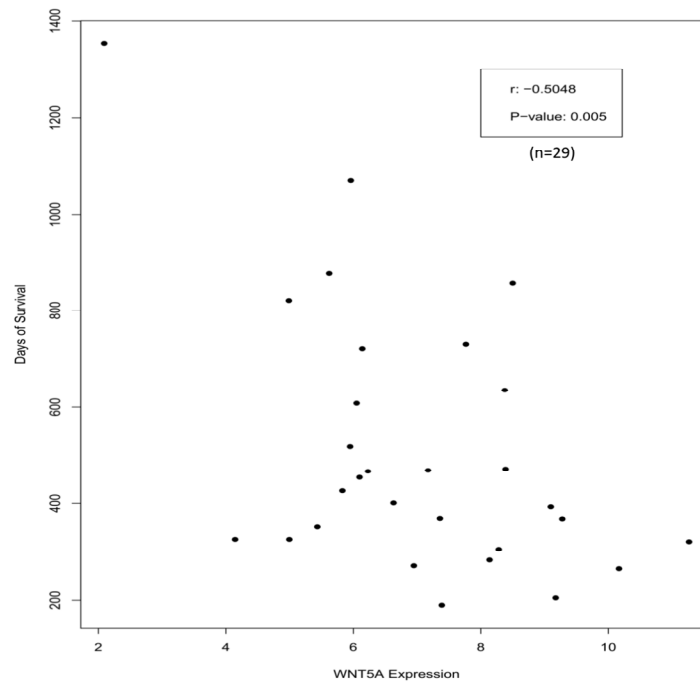

**Figure S1. Wnt5a is a key molecule controlling the immunosuppressive desmoplastic TME.** Excessive Wnt5a correlates with poorer patient overall survival.  $n = 29$ . \*:  $p < 0.05$ , \*\*:  $p < 0.01$ .

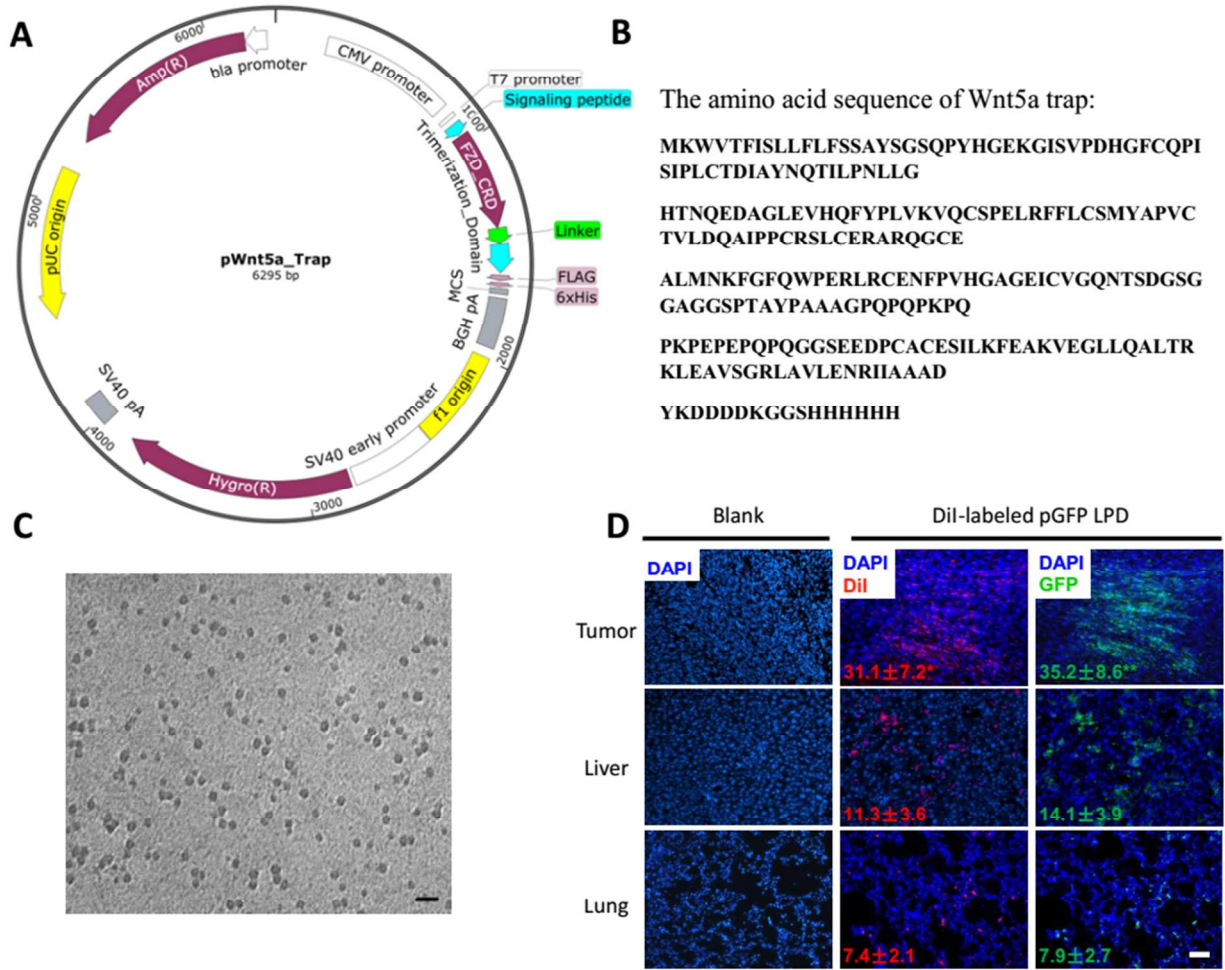

**Figure S2. Local distribution and expression of Wnt5a trapping.** (A) The plasmid map for the Wnt5a trap. (B) The amino acid sequence of the monomeric version of Wnt5a trap. (C) TEM image of LPD NP (vector for encapsulating plasmid). Scale bar indicates 300 nm. (D) Fluorescence images of DiI distribution in tumor, liver and lung. Numbers indicate % cells taken up DiI (red) or expressed GFP (green).  $n = 3$ . Scale bar indicates 300  $\mu\text{m}$ . \*:  $p < 0.05$ , \*\*:  $p < 0.01$ .

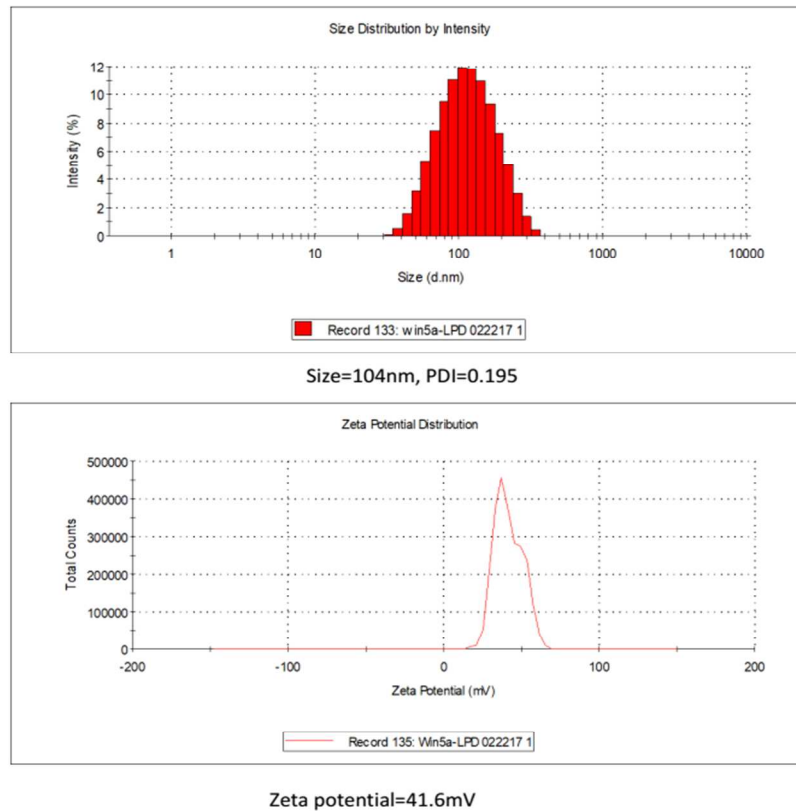

**Figure S3. Size and zeta potential of the Wnt5a trap.** DLS depicting size (104 nm), PDI (0.195) and Zeta potential (41.6 mV) of trap cDNA encapsulated LPD NPs.

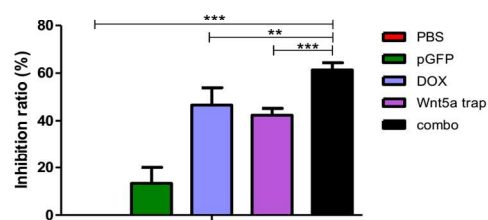

**Figure S4. Combination therapy significantly inhibited tumor progression.** Figure depicts tumor weight inhibition ratio on day 27 (tumor inhibition study endpoint). n = 8. \*\*:  $p < 0.01$ , \*\*\*:  $p < 0.001$ .

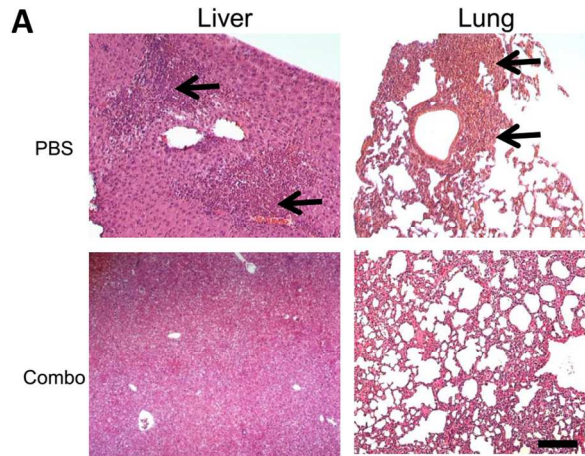

**Figure S5. Combination therapy demonstrated long-lasting overall immune response. (A)** H&E staining shows the histology of tumor metastasis in the major organs. Black arrows indicate metastasis loci. Scale bar indicates 300 μm.

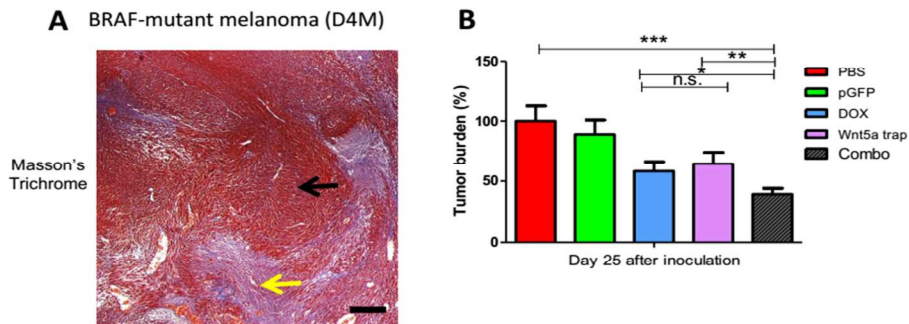

**Figure S6. Second model of BRAF-mutant melanoma. (A)** D4M cell line inoculated mice were used as the second BRAF-mutant model, where different treatments were applied accordingly. Masson's trichrome staining depicting collagen morphology in untreated tumor. Black arrow indicates tumor nest, yellow arrow indicates surrounding stromal region. Scale bar indicates 300 μm. **(B)** Effectiveness of therapies were compared by monitoring tumor growth every 2-3 days, on day 25 after inoculation, tumor burden between groups were compared and quantified. n = 5, n.s.:  $p > 0.05$ , \*:  $p < 0.05$ , \*\*:  $p < 0.01$ , \*\*\*:  $p < 0.001$ .

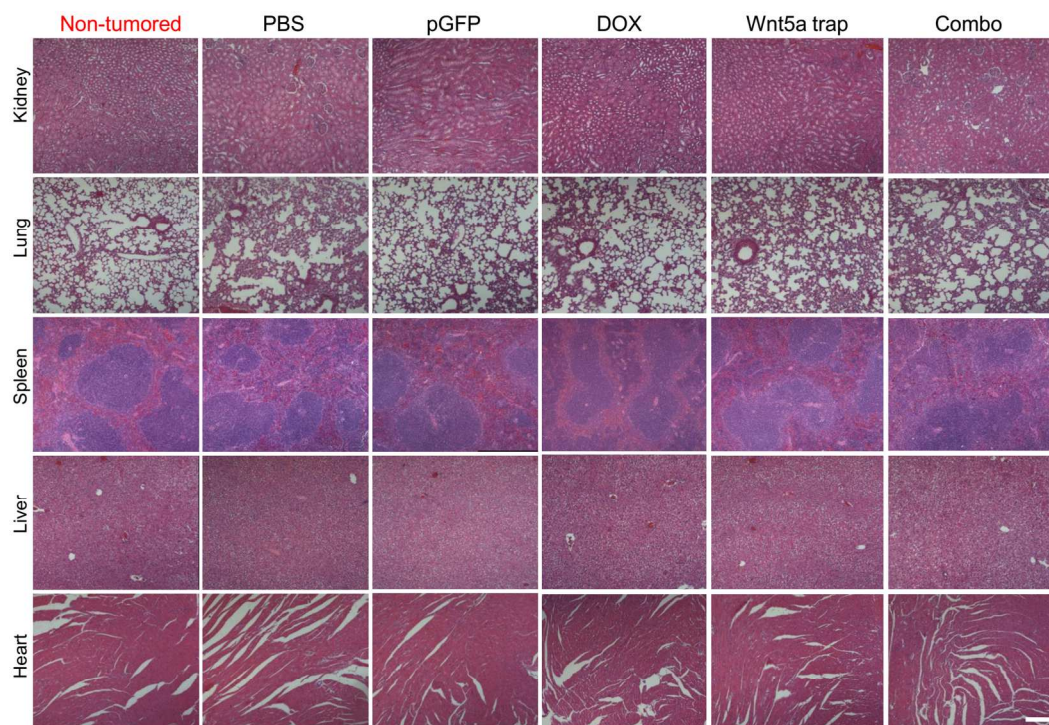

**Figure S7. H&E morphology under different therapies.** At the endpoint of tumor inhibition study, mice were humanely euthanized, major organs were collected, sectioned, and stained for H&E analysis. Non-tumored mice were also examined as control. Scale bar indicates 300  $\mu$ m.

**Table S1.** Antibody list

| Antibodies                                                | Company                     | Catalog | Application  |
|-----------------------------------------------------------|-----------------------------|---------|--------------|
| Anti-CD8 (PE-conjugated)                                  | BD                          | 553032  | flow cyt, IF |
| Anti-CD4 (FITC-conjugated)                                | BD                          | 561828  | flow cyt, IF |
| Anti-CD11b (FITC-conjugated)                              | BD                          | 553310  | flow cyt     |
| Anti-Gr1 (Ly-6G and Ly-6C) (PE-conjugated)                | BD Pharmingen <sup>TM</sup> | 553128  | flow cyt     |
| Anti-CD45 (FITC-conjugated)                               | BD Pharmingen <sup>TM</sup> | 553080  | flow cyt     |
| Anti-CD62L (FITC-conjugated)                              | BD Pharmingen <sup>TM</sup> | 553150  | flow cyt, IF |
| Anti-CD44 (FITC-conjugated)                               | BD Pharmingen <sup>TM</sup> | 553133  | IF           |
| Anti-CD103 (PE-conjugated)                                | Biolegend                   | 121406  | flow cyt     |
| Hoechst 33342                                             | ThermoFisher                | H1399   | IF           |
| ProLong <sup>TM</sup> Diamond Antifade Mountant with DAPI | ThermoFisher                | P36971  | IF           |
| Anti-CD206 (FITC-conjugated)                              | Biolegend                   | 141704  | flow cyt     |
| Anti-F4/80 (FITC-conjugated)                              | BD Pharmingen <sup>TM</sup> | 565410  | flow cyt     |
| Anti-CD274 (PE-conjugated)                                | BD Pharmingen <sup>TM</sup> | 558091  | flow cyt     |
| Anti-CD11c (FITC-conjugated)                              | BD Pharmingen <sup>TM</sup> | 557400  | flow cyt     |
| Anti-CD69 (FITC-conjugated)                               | BD Pharmingen <sup>TM</sup> | 553236  | flow cyt     |
| Anti-MHCII (PE-conjugated)                                | BD Pharmingen <sup>TM</sup> | 553570  | flow cyt     |
| Anti-Wnt5a                                                | Abcam                       | Ab72583 | WB, IF       |
| Anti-CRT                                                  | Abcam                       | Ab2907  | IF           |
| Anti-HMGB1                                                | Abcam                       | Ab18256 | IF           |
| GAPDH                                                     | Santa Cruz                  | I3015   | WB           |

**Table S2.** Primer list for real-time PCR

| Antibodies          | Applied Biosystems/Ref |
|---------------------|------------------------|
| Mouse IFN- $\gamma$ | Mm01168134_m1          |
| Mouse IL12 $\alpha$ | Mm00434169_m1          |
| Mouse TNF- $\alpha$ | Mm00443260_g1          |
| Mouse TGF- $\beta$  | Mm01178820_m1          |
| Mouse CCL2          | Mm00441242_m1          |
| Mouse GAPDH         | Mm99999915_g1          |
